# Supplementary material for: Plant expression and characterization of the transmission-blocking vaccine candidate PfGAP50
Source: PubMed Central journal article supplement (PMC4665938; doi:10.1186/s12896-015-0225-x), 2015-12-01
Supplement: 12896_2015_225_MOESM1_ESM.pdf [file 12896_2015_225_MOESM1_ESM.pdf]

## Additional file 1

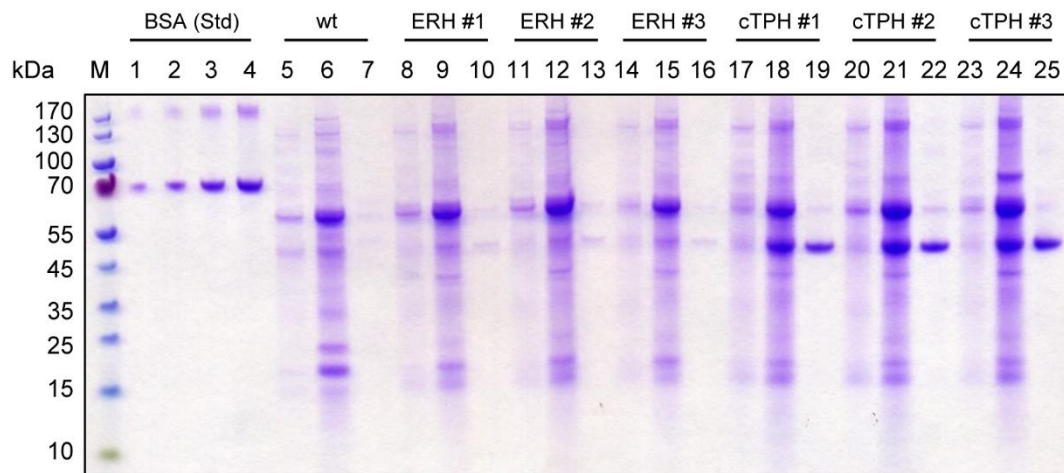

Additional file 1: SDS-PAGE based quantification (densitometric against a BSA standard) of *PfGAP50* variants in IMAC elution fractions (three independent replicate each). Mock purification of wt *N. benthamiana* extract was included. Proteins were eluted from the IMAC column using three elution steps (elution 1 (E1): 10 mM imidazole; elution 2 (E2): 100 mM imidazole and elution 3 (E3): 250 mM imidazole). 6  $\mu$ l of each sample was loaded under reducing conditions. 1: 150 ng BSA/slot; 2: 300 ng BSA/slot; 3: 600 ng BSA/slot; 4: 900 ng BSA/slot; 5-7: E1-3 from mock purification; 8-10: E1-3 from *PfGAP50*-ERH repeat 1; 11-13: E1-3 from *PfGAP50*-ERH repeat 2; 14-16: E1-3 from *PfGAP50*-ERH repeat 3; 17-19: E1-3 from *PfGAP50*-cTPH repeat 1; 20-22: E1-3 from *PfGAP50*-cTPH repeat 2; 23-25: E1-3 from *PfGAP50*-cTPH repeat 3.
